# Supplementary material
Source: publisher site journal article supplement (https://www.dovepress.com/get_supplementary_file.php?f=455530.docx)
Supplement: Supplementary file 1 [file get_supplementary_file.php]

**The Survey for the PERIXa Trial**

Dear Doctor,

Greetings. We are the cardiology research team at Seoul National University Hospital. You are scheduled to perform a procedure on a patient enrolled in our study titled "The effectiveness and safety of PERIoperative factor Xa inhibitor discontinuation in AF patients who undergoing minor bleeding risk elective procedure or surgery: a prospective, multicenter, non-Interventional trial (PERIXa trial)."

For patients with non-valvular atrial fibrillation, anticoagulation therapy is a critical treatment for preventing strokes and systemic embolisms. These patients, while on oral anticoagulants, inevitably face the suspension of their medication when undergoing invasive procedures. There is research on anticoagulant discontinuation before and after procedures/surgeries classified as low or high risk for bleeding. Still, there is a lack of systematic large-scale research concerning procedures/surgeries classified as having a minor risk of bleeding (such as dental, ophthalmic, or gastrointestinal [GI] endoscopic procedures).

Our study targets non-valvular atrial fibrillation patients who are prescribed direct Factor Xa inhibitors for stroke prevention. We aim to evaluate the clinical outcomes when these patients follow the study protocol (discontinue the direct factor Xa inhibitor one day before and resume it the day after their scheduled dental/ophthalmic/GI endoscopic procedures/surgeries).

We are sending you this survey to gather precise information about your patients' actual procedures and your opinion on any bleeding during the procedures. Since patients on lifelong anticoagulation therapy frequently encounter such low-bleeding-risk procedures, we believe this study will provide essential and valuable data for the appropriate management of atrial fibrillation patients with oral anticoagulants. Despite your busy schedule, we would greatly appreciate it if you could spare some time to answer the post-procedure survey. Your contribution will be invaluable to our research. Thank you for your assistance.

Sincerely, The PERIXa Study Team.

1. **What type of procedure or surgery did you perform? (Please check the type of procedure/surgery along with the department.)**

| [ ] Dental | [ ] ① Extraction of 1 to 3 teeth |
| --- | --- |
| [ ] ② Extraction of 4 to 6 teeth |
| [ ] ③ Extraction of more than 7 teeth |
| [ ] ④ Periodontal surgery |
| [ ] ⑤ Incision of abscess |
| [ ] ⑥ Implant surgery (including primary surgery, secondary surgery, and bone grafting) |
| [ ] Ophthalmology | [ ] ⑦ Cataract surgery |
| [ ] ⑧ Glaucoma surgery |
| [ ] Endoscopy | [ ] ⑨ Diagnostic gastroscopy ± biopsy ( ___ species) |
| [ ] ⑩ Diagnostic colonoscopy ± biopsy ( ___ species) |
| [ ] ⑪ Therapeutic endoscopy (EMR): Gastric [ ] / Colonic [ ] endoscopy ( ___ number) |
| [ ] ⑫ Therapeutic endoscopy (EMR>2cm polyp or ESD): Gastric [ ] / Colonic [ ] endoscopy ( ___ number) |
| [ ] Other |  |

1. **What was the effect of anticoagulant discontinuation on bleeding during or after the procedure/surgery for the patient?**
2. None at all
3. Similar to the expected level in a general patient not on anticoagulation
4. More bleeding during or immediately after the procedure than in a general patient not on anticoagulation, but controllable during the procedure (e.g., hemoclip, argon plasma coagulation, band ligation) to the level of minor bleeding
5. More bleeding during or immediately after the procedure than in a general patient not on anticoagulation, requiring special measures for hemostasis (e.g., vascular embolization, emergency surgery) or transfusion to the level of major bleeding
6. Post-procedure/surgery re-intervention or additional endoscopy due to delayed bleeding
7. Other:
8. **Please write any additional comments you may have for the research team.**

**Date of survey completion: __ __ __ __ / __ __ / __ __ (YYYY/MM/DD)**

* Thank you for assisting with the research and providing valuable information.
